# Supplementary material for: Identification of Key Proteins in the Alternative Lengthening of Telomeres Associated Promyelocytic Leukemia Nuclear Bodies
Source: Preprints.org preprint supplement (doi:10.20944/preprints202110.0001.v1), 2021-10-01
Supplement: Supplementary file 1 [file supplementary]

## Sheet: Sheet1
Table S4. TCGA Study vs gene (normalized)
GENE	NSMCE2	SENP5	NBN	TERF1	ATR	HUS1	ATM	PCNA	TP53BP1	SENP6	XRCC6	MRE11	RAD50	CBX3	PARP2	ACD	BAZ2A	KDM4C	SUMO2	UPF1	CDKN1A	POT1	TERF2	RAD17	TINF2	NABP2	DNMT1	WRN	TERF2IP	RAD52	PIAS4	GNL3L	RPA1	UBE2I	TOP3A	SENP7	BLM	SENP3	HMGB1	PML	FANCD2	ERCC4	SENP1	MORC3	SUMO3	MUS81	ZBTB48	KMT5C	HMBOX1
TCGA_UCS (n=56)	0.263158	0.385965	0.210526	0.385965	0.175439	0.192982	0.280702	0.192982	0.263158	0.122807	0.175439	0.105263	0.157895	0.22807	0.175439	0.122807	0.140351	0.140351	0.210526	0.368421	0.105263	0.210526	0.333333	0.0526316	0.22807	0.122807	0.192982	0.0526316	0.0175439	0.0350877	0.263158	0.0877193	0.0877193	0.175439	0.263158	0.0526316	0.192982	0.105263	0.192982	0.175439	0.22807	0.175439	0.157895	0.0350877	0.0526316	0.157895	0.0526316	0.0350877	0.0877193
TCGA_ESCA (n=181)	0.0659341	0.0824176	0.0769231	0.0824176	0.0989011	0.17033	0.104396	0.164835	0.153846	0.60989	0.0769231	0.0714286	0.10989	0.203297	0.0769231	0.340659	0.17033	0.0549451	0.445055	0.120879	0.972527	0.115385	0.0714286	0.0934066	0.148352	0.241758	0.0824176	0.0604396	0.0879121	0.131868	0.164835	0.0494505	0.0824176	0.10989	0.0989011	0.0494505	0.104396	0.043956	0.148352	0.0659341	0.0879121	0.126374	0.0659341	0.0604396	0.0989011	0.0989011	0.175824	0.0879121	0.120879
TCGA_UCEC (n=507)	0.232514	0.310019	0.168242	0.173913	0.215501	0.0869565	0.26276	0.111531	0.187146	0.1569	0.1569	0.181474	0.143667	0.0926276	0.117202	0.151229	0.136106	0.136106	0.130435	0.175803	0.0850662	0.215501	0.0982987	0.134216	0.0982987	0.126654	0.206049	0.113422	0.10775	0.0964083	0.094518	0.124764	0.0661626	0.124764	0.136106	0.119093	0.122873	0.147448	0.10397	0.160681	0.0982987	0.094518	0.126654	0.111531	0.162571	0.0831758	0.0756144	0.136106	0.109641
TCGA_SKCM (n=363)	0.244344	0.147059	0.178733	0.214932	0.217195	0.190045	0.18552	0.133484	0.246606	0.142534	0.0904977	0.190045	0.210407	0.260181	0.169683	0.174208	0.0723982	0.081448	0.0904977	0.133484	0.104072	0.0972851	0.113122	0.156109	0.0972851	0.108597	0.138009	0.140271	0.106335	0.0972851	0.0723982	0.115385	0.0701357	0.106335	0.10181	0.126697	0.149321	0.0995475	0.0904977	0.104072	0.0769231	0.117647	0.0791855	0.156109	0.171946	0.135747	0.0904977	0.104072	0.0972851
TCGA_BLCA (n=402)	0.243309	0.289538	0.272506	0.199513	0.226277	0.145985	0.201946	0.160584	0.141119	0.0875912	0.124088	0.143552	0.160584	0.104623	0.131387	0.138686	0.111922	0.104623	0.114355	0.0924574	0.126521	0.107056	0.080292	0.080292	0.0973236	0.194647	0.107056	0.107056	0.109489	0.0948905	0.0900243	0.0827251	0.109489	0.107056	0.16545	0.080292	0.0924574	0.206813	0.0875912	0.0632603	0.124088	0.0583942	0.109489	0.119221	0.107056	0.131387	0.107056	0.121655	0.121655
TCGA_ACC (n=76)	0.163043	0.141304	0.130435	0.141304	0.0978261	0.195652	0.119565	0.163043	0.0652174	0.163043	0.391304	0.0543478	0.0869565	0.0217391	0.195652	0.184783	0.152174	0.076087	0.130435	0.23913	0.25	0.184783	0.152174	0.293478	0.173913	0.0652174	0.119565	0.163043	0.0652174	0.076087	0.369565	0.0652174	0.184783	0.293478	0.0326087	0.163043	0.0543478	0.0652174	0.108696	0.152174	0.217391	0.0869565	0.0652174	0.076087	0.076087	0.0869565	0.0543478	0.076087	0.0326087
TCGA_LUSC (n=466)	0.110883	0.907598	0.158111	0.160164	0.531828	0.174538	0.125257	0.166324	0.12731	0.11499	0.0821355	0.131417	0.125257	0.190965	0.117043	0.102669	0.0800821	0.193018	0.141684	0.0862423	0.0698152	0.141684	0.211499	0.0533881	0.0225873	0.073922	0.073922	0.063655	0.0287474	0.036961	0.0841889	0.0574949	0.0903491	0.0944559	0.13347	0.110883	0.11499	0.129363	0.0554415	0.0677618	0.104723	0.073922	0.0862423	0.0965092	0.104723	0.0821355	0.0390144	0.0616016	0.0985626
TCGA_CESC (n=275)	0.178451	0.680135	0.151515	0.117845	0.457912	0.104377	0.124579	0.151515	0.131313	0.127946	0.104377	0.255892	0.0673401	0.104377	0.0875421	0.0875421	0.131313	0.158249	0.144781	0.117845	0.0841751	0.0909091	0.0505051	0.127946	0.0774411	0.104377	0.154882	0.0606061	0.0942761	0.0875421	0.0673401	0.0976431	0.141414	0.107744	0.131313	0.111111	0.138047	0.0976431	0.0808081	0.0774411	0.141414	0.0505051	0.043771	0.0505051	0.104377	0.0942761	0.0639731	0.117845	0.0841751
TCGA_BRCA (n=994)	0.48524	0.160517	0.251845	0.344096	0.100554	0.0987085	0.097786	0.164207	0.104244	0.097786	0.122694	0.130074	0.101476	0.170664	0.0867159	0.0931734	0.180812	0.152214	0.114391	0.111624	0.0433579	0.108856	0.108856	0.115314	0.0599631	0.0839483	0.111624	0.159594	0.0811808	0.099631	0.0756458	0.127306	0.182657	0.183579	0.190959	0.0765683	0.122694	0.0691882	0.119926	0.050738	0.0839483	0.165129	0.0821033	0.0913284	0.0728782	0.0968635	0.0922509	0.0830258	0.0673432
TCGA_COAD (n=524)	0.207071	0.102694	0.151515	0.208754	0.111111	0.178451	0.213805	0.220539	0.136364	0.121212	0.136364	0.148148	0.149832	0.127946	0.117845	0.116162	0.0942761	0.143098	0.106061	0.107744	0.0757576	0.193603	0.122896	0.10101	0.10101	0.0808081	0.0925926	0.0959596	0.0841751	0.252525	0.0808081	0.117845	0.131313	0.0690236	0.0656566	0.10101	0.0858586	0.0757576	0.0740741	0.0723906	0.0656566	0.0555556	0.131313	0.0875421	0.0791246	0.0555556	0.254209	0.0858586	0.102694
TCGA_STAD (n=407)	0.352273	0.161364	0.202273	0.154545	0.170455	0.209091	0.181818	0.172727	0.125	0.115909	0.109091	0.177273	0.138636	0.102273	0.109091	0.125	0.0386364	0.186364	0.102273	0.0727273	0.0818182	0.145455	0.120455	0.075	0.0681818	0.115909	0.0818182	0.0454545	0.0977273	0.075	0.118182	0.0704545	0.0840909	0.0681818	0.0590909	0.111364	0.109091	0.134091	0.0727273	0.0681818	0.138636	0.140909	0.0727273	0.0886364	0.113636	0.0931818	0.163636	0.0886364	0.0772727
TCGA_SARC (n=251)	0.121569	0.113725	0.129412	0.0980392	0.0862745	0.164706	0.0941176	0.113725	0.105882	0.0627451	0.0901961	0.0980392	0.121569	0.141176	0.0627451	0.105882	0.0745098	0.211765	0.0980392	0.156863	0.0627451	0.0980392	0.0901961	0.0784314	0.152941	0.054902	0.184314	0.14902	0.145098	0.0941176	0.0784314	0.360784	0.121569	0.0745098	0.0941176	0.0901961	0.145098	0.0745098	0.0705882	0.145098	0.0588235	0.0588235	0.113725	0.152941	0.0705882	0.0509804	0.105882	0.133333	0.0823529
TCGA_HNSC (n=488)	0.221797	0.590822	0.164436	0.206501	0.349904	0.18738	0.105163	0.105163	0.0975143	0.10325	0.116635	0.130019	0.107075	0.0994264	0.0898662	0.0745698	0.101338	0.189293	0.116635	0.105163	0.0592734	0.124283	0.1587	0.0956023	0.0803059	0.0592734	0.0898662	0.108987	0.0745698	0.0611855	0.0535373	0.0630975	0.0783939	0.0745698	0.0745698	0.0783939	0.0688337	0.0975143	0.0458891	0.0573614	0.0726577	0.14914	0.0630975	0.0592734	0.135755	0.145315	0.040153	0.0630975	0.082218
TCGA_LUAD (n=503)	0.181979	0.185512	0.171378	0.284452	0.146643	0.180212	0.190813	0.120141	0.120141	0.118375	0.102473	0.167845	0.155477	0.0565371	0.137809	0.137809	0.106007	0.144876	0.130742	0.0724382	0.0848057	0.120141	0.106007	0.0812721	0.118375	0.0636042	0.0583039	0.107774	0.0724382	0.0530035	0.0971731	0.10424	0.111307	0.107774	0.116608	0.0918728	0.0724382	0.113074	0.0742049	0.0706714	0.0565371	0.0618375	0.0971731	0.107774	0.100707	0.090106	0.0742049	0.0830389	0.0830389
TCGA_CHOL (n=36)	0.305556	0.166667	0.222222	0.25	0.0555556	0.0277778	0.0833333	0.138889	0.194444	0.444444	0.222222	0.0833333	0.0833333	0.0833333	0.111111	0.111111	0.166667	0.0555556	0.0833333	0.138889	0.0555556	0.0555556	0.138889	0.222222	0.0833333	0.0833333	0.0833333	0.0555556	0.138889	0.166667	0.0555556	0.0555556	0.0555556	0.0277778	0.0277778	0.111111	0.166667	0.0555556	0.166667	0.0833333	0.0555556	0.138889	0.0833333	0.111111	0.111111	0.0277778	0.138889	0.0833333	0.0833333
TCGA_OV (n=201)	0.439316	0.316239	0.196581	0.0769231	0.164103	0.0871795	0.104274	0.121368	0.0837607	0.0871795	0.112821	0.14359	0.0820513	0.131624	0.0957265	0.0769231	0.160684	0.129915	0.0871795	0.150427	0.145299	0.131624	0.147009	0.203419	0.179487	0.109402	0.145299	0.0905983	0.0700855	0.150427	0.0581197	0.0205128	0.121368	0.111111	0.0495726	0.0923077	0.0752137	0.0632479	0.0529915	0.0529915	0.0461538	0.0512821	0.0803419	0.0547009	0.0837607	0.0581197	0.0273504	0.0683761	0.0769231
TCGA_LIHC (n=348)	0.567204	0.0860215	0.319892	0.352151	0.0887097	0.104839	0.0887097	0.129032	0.0887097	0.126344	0.150538	0.0913978	0.0833333	0.077957	0.0806452	0.107527	0.112903	0.0483871	0.0860215	0.11828	0.0268817	0.0913978	0.0483871	0.112903	0.094086	0.120968	0.0591398	0.120968	0.094086	0.077957	0.0672043	0.0913978	0.0725806	0.0672043	0.150538	0.0698925	0.0672043	0.094086	0.0672043	0.0833333	0.077957	0.120968	0.0806452	0.0698925	0.0913978	0.0887097	0.0913978	0.0483871	0.0537634
TCGA_TGCT (n=144)	0.181208	0.0402685	0.288591	0.0805369	0.0536913	0.342282	0.0469799	0.0939597	0.134228	0.0604027	0.0604027	0.0738255	0.288591	0.0469799	0.234899	0.154362	0.107383	0.100671	0.0939597	0.0738255	0.0671141	0.228188	0.0536913	0.00671141	0.0268456	0.0805369	0.0469799	0.0536913	0.0469799	0.0268456	0.0604027	0.0939597	0.033557	0.0536913	0.120805	0.154362	0.0536913	0.0671141	0.127517	0.14094	0.0604027	0.0939597	0.208054	0.127517	0.0671141	0.0134228	0.0805369	0.0402685	0.114094
TCGA_MESO (n=82)	0.137931	0.0804598	0.0574713	0.091954	0.149425	0.137931	0.103448	0.045977	0.195402	0.114943	0.114943	0.137931	0.091954	0.0804598	0.126437	0.0689655	0.241379	0.0804598	0.0689655	0.149425	0.091954	0.091954	0.103448	0.114943	0.114943	0.0689655	0.149425	0.0574713	0.0804598	0.0689655	0.091954	0.0114943	0.091954	0.103448	0.126437	0.091954	0.149425	0.0804598	0.0344828	0.0574713	0.0574713	0.0344828	0.114943	0.0574713	0.045977	0.0229885	0.045977	0.0804598	0.0689655
TCGA_PAAD (n=168)	0.293478	0.108696	0.130435	0.152174	0.11413	0.146739	0.11413	0.108696	0.11413	0.146739	0.119565	0.0978261	0.11413	0.0815217	0.103261	0.130435	0.048913	0.076087	0.11413	0.0652174	0.0652174	0.0706522	0.157609	0.108696	0.0326087	0.076087	0.0597826	0.0923913	0.0815217	0.157609	0.0706522	0.244565	0.0706522	0.0380435	0.0869565	0.103261	0.0978261	0.0815217	0.0652174	0.0923913	0.125	0.0543478	0.048913	0.0652174	0.048913	0.0597826	0.0380435	0.0815217	0.0597826
TCGA_DLBC (n=39)	0.145833	0.1875	0.125	0.104167	0.104167	0.125	0.0833333	0.125	0.1875	0.0416667	0.104167	0.0625	0.0625	0.0208333	0.0833333	0.208333	0.0833333	0.125	0.0833333	0.0833333	0.0625	0.0833333	0.0416667	0.0416667	0.0416667	0.166667	0.0625	0.0625	0.166667	0.0833333	0.145833	0.0625	0.125	0.125	0.0416667	0.0833333	0.0833333	0.0833333	0.0625	0.208333	0.104167	0.0833333	0.0625	0.0208333	0.0208333	0.125	0.104167	0.0625	0.0208333
TCGA_PRAD (n=488)	0.257085	0.147773	0.212551	0.216599	0.0870445	0.0465587	0.15587	0.082996	0.107287	0.0910931	0.0870445	0.097166	0.115385	0.0789474	0.0303644	0.0364372	0.220648	0.119433	0.0465587	0.0607287	0.0526316	0.103239	0.0445344	0.194332	0.180162	0.0546559	0.0668016	0.0708502	0.168016	0.101215	0.0465587	0.0748988	0.0910931	0.0546559	0.0384615	0.048583	0.0587045	0.0526316	0.0890688	0.0587045	0.0647773	0.0789474	0.0870445	0.062753	0.0708502	0.0607287	0.107287	0.103239	0.0182186
TCGA_KICH	0.2	0.0461538	0.184615	0.153846	0.0615385	0.0769231	0.138462	0.169231	0.107692	0	0.0615385	0.0923077	0.123077	0.107692	0.0769231	0.0769231	0.123077	0.169231	0.0923077	0.0769231	0.0615385	0.0307692	0.0923077	0.0769231	0.153846	0.153846	0.0923077	0.138462	0.0461538	0.0615385	0.0769231	0.0307692	0.153846	0.0923077	0.0307692	0.123077	0.0461538	0.0307692	0.0461538	0.138462	0.0615385	0.123077	0.0615385	0.169231	0.0769231	0.2	0.0153846	0.0923077	0.107692
TCGA_KIRP (n=274)	0.0742049	0.123675	0.0706714	0.0565371	0.120141	0.0671378	0.0918728	0.106007	0.0777385	0.0600707	0.120141	0.0812721	0.134276	0.0742049	0.176678	0.0989399	0.0918728	0.0706714	0.0742049	0.0636042	0.116608	0.0424028	0.0848057	0.0636042	0.229682	0.0600707	0.0565371	0.134276	0.360424	0.137809	0.0636042	0.120141	0.151943	0.102473	0.0671378	0.0812721	0.0459364	0.0918728	0.0848057	0.04947	0.04947	0.0636042	0.0600707	0.0530035	0.0812721	0.0388693	0.0530035	0.106007	0.0565371
TCGA_PCPG (n=161)	0.117978	0.303371	0.0786517	0.0786517	0.162921	0.0393258	0.123596	0.11236	0.0730337	0.0842697	0.0786517	0.0898876	0.0674157	0.252809	0.0955056	0.0955056	0.0561798	0.0449438	0.0674157	0.0449438	0.0505618	0.0955056	0.0617978	0.0561798	0.0505618	0.0674157	0.0786517	0.0955056	0.0786517	0.134831	0.0898876	0.101124	0.0617978	0.0393258	0.0505618	0.0617978	0.0224719	0.0730337	0.0730337	0.0955056	0.0898876	0.0730337	0.0337079	0.0674157	0.0505618	0.0842697	0.0842697	0.0674157	0.117978
TCGA_LGG (n=507)	0.145914	0.0856031	0.0914397	0.07393	0.0544747	0.14786	0.103113	0.114786	0.103113	0.0933852	0.107004	0.0817121	0.114786	0.0992218	0.206226	0.0564202	0.0836576	0.110895	0.0914397	0.107004	0.0447471	0.0642023	0.122568	0.0797665	0.0700389	0.07393	0.0894942	0.128405	0.0642023	0.0603113	0.0603113	0.0661479	0.0486381	0.0622568	0.0875486	0.0583658	0.0622568	0.0700389	0.0544747	0.0447471	0.07393	0.0564202	0.0447471	0.0914397	0.0564202	0.0700389	0.101167	0.0700389	0.0583658
TCGA_KIRC (n=352)	0.0273438	0.0957031	0.0546875	0.0605469	0.0820312	0.0742188	0.119141	0.158203	0.0917969	0.0644531	0.251953	0.0878906	0.0898438	0.0820312	0.121094	0.078125	0.0898438	0.0546875	0.0644531	0.0527344	0.0820312	0.0449219	0.0703125	0.0722656	0.0585938	0.0800781	0.0410156	0.142578	0.0664062	0.0859375	0.0820312	0.0644531	0.0703125	0.0585938	0.0546875	0.0761719	0.0585938	0.0644531	0.0605469	0.0703125	0.0585938	0.0527344	0.0449219	0.0761719	0.0507812	0.0507812	0.0351562	0.0664062	0.046875
TCGA_UVM (n=80)	0.175	0.0125	0.3875	0.275	0.0125	0.0625	0.0625	0.0625	0.05	0.0875	0.0875	0.05	0.0375	0.0625	0.0125	0.0625	0.0875	0.025	0.05	0.0375	0.05	0.0875	0.05	0.0125	0.075	0.0375	0.0375	0.075	0.075	0.075	0.0625	0.0625	0.05	0.025	0.0625	0.0375	0.025	0.0375	0.1375	0.0375	0.05	0.05	0.0875	0.025	0.05	0.0375	0.0125	0.075	0.0625
TCGA_LAML (n=165)	0.0969697	0.0424242	0.0787879	0.0727273	0.0424242	0.0909091	0.109091	0.0363636	0.0181818	0.0606061	0.0727273	0.10303	0.0969697	0.0909091	0.0666667	0.0606061	0.0424242	0.0545455	0.0545455	0.0666667	0.0484848	0.0484848	0.0545455	0.0484848	0.0848485	0.0484848	0.0848485	0.0363636	0.0727273	0.0727273	0.0424242	0.109091	0.0363636	0.0606061	0.030303	0.0484848	0.0484848	0.109091	0.0848485	0.0484848	0.0424242	0.0666667	0.0787879	0.0848485	0.0424242	0.0666667	0.0484848	0.030303	0.10303
TCGA_THCA (n=480)	0.0440882	0.0601202	0.0521042	0.0440882	0.0681363	0.0581162	0.0981964	0.0821643	0.0881764	0.0501002	0.0641283	0.0661323	0.0360721	0.128257	0.0641283	0.0480962	0.0701403	0.0601202	0.0501002	0.0521042	0.0541082	0.0521042	0.0480962	0.0801603	0.0661323	0.0901804	0.0561122	0.0541082	0.0821643	0.0721443	0.0480962	0.0541082	0.0440882	0.0601202	0.0440882	0.0440882	0.0400802	0.0621242	0.0641283	0.0621242	0.0420842	0.0460922	0.0460922	0.0420842	0.0480962	0.0501002	0.0541082	0.0480962	0.0501002
TCGA_THYM (n=119)	0.0162602	0.0731707	0.0731707	0.0325203	0.0813008	0.0487805	0.105691	0.0162602	0.0813008	0.0325203	0.097561	0.0650407	0.00813008	0.0487805	0.0650407	0.0243902	0.0569106	0.0569106	0.097561	0.0487805	0.0569106	0.0406504	0.0325203	0.0731707	0.0406504	0.121951	0.0243902	0.0650407	0.0406504	0.0650407	0.0406504	0.0731707	0.0243902	0.0487805	0.0406504	0.0894309	0.00813008	0.0650407	0.0650407	0.00813008	0.0325203	0.0325203	0.0650407	0.0162602	0.0325203	0.0243902	0.0162602	0.0325203	0.0650407
TCGA_GBM (n=145)	0.0273504	0.0461538	0.0188034	0.0273504	0.0358974	0.128205	0.0444444	0.0393162	0.0478632	0.0290598	0.025641	0.0376068	0.0598291	0.0461538	0.0717949	0.0461538	0.0239316	0.0564103	0.017094	0.0410256	0.0119658	0.0222222	0.0324786	0.0290598	0.0188034	0.0358974	0.0444444	0.0239316	0.0136752	0.0153846	0.0290598	0.0188034	0.0239316	0.034188	0.017094	0.025641	0.0205128	0.0564103	0.0188034	0.017094	0.0222222	0.0102564	0.0239316	0.0376068	0.0239316	0.0188034	0.0222222	0.0188034	0.025641
[truncated: 22 more columns]
