# Supplementary material for: Identification of Key Proteins in the Alternative Lengthening of Telomeres Associated Promyelocytic Leukemia Nuclear Bodies
Source: Preprints.org preprint supplement (doi:10.20944/preprints202110.0001.v1), 2021-10-01
Supplement: Supplementary file 2 [file S1_File.xlsx]

## Sheet: Sheet1
Table S1. Gene/protein set
Gene	Gene ID	HGNC ID	Ensembl ID	RefSeq ID	UniProt ID	Cellular Function	TM Functions	ALT Function	Predicted TMM	TM Significance	TelNet Score
ACD	65057	NM_001082486; NM_001082487; NM_022914;	ENSG00000102977	HGNC:25070	Q96AP0	Telomere biology	Shelterin component; Telomere structure; Telomerase activity; ALT associated PML nuclear bodies (APBs); Telomere repeat binding	ALT: ambiguous; Telomerase-mediated: ambiguous	ambiguous	validated	10
ATM	472	NM_138292; NM_138293; NM_000051;	ENSG00000149311	HGNC:795	Q13315	DNA replication and repair	DNA repair / damage response; ALT associated PML nuclear bodies (APBs); Telomerase activity;	ALT: enhancing; Telomerase-mediated: enhancing	ambiguous	validated	6
ATR	545	NM_001184;	ENSG00000175054	HGNC:882	Q13535	DNA replication and repair	DNA repair / damage response; Telomerase activity; ALT associated PML nuclear bodies (APBs); Telomerase localization;	ALT: enhancing; Telomerase-mediated: enhancing	ambiguous	validated	7
BAZ2A	11176	NM_001300905; NM_013449;	ENSG00000076108	HGNC:962	Q9UIF9	Chromatin organization	Chromatin remodeling; ALT associated PML nuclear bodies (APBs);	ALT: ambiguous; Telomerase-mediated: repressing	ALT	validated	5
BLM	641	NM_001287246; NM_001287248; NM_001287247; NM_000057;	ENSG00000197299	HGNC:1058	P54132	DNA replication and repair	ALT associated PML nuclear bodies (APBs); DNA repair / damage response; Telomere structure; Extrachromosomal telomeric repeat formation; Shelterin binding	ALT: enhancing; Telomerase-mediated: ambiguous	ALT	validated	8
CBX3	11335	NM_007276;	ENSG00000122565	HGNC:1553	Q13185	Chromatin organization	ALT associated PML nuclear bodies (APBs); Chromatin structure;	ALT: enhancing; Telomerase-mediated: ambiguous	ALT	validated	6
CDKN1A	1026	NM_001220777; NM_001220778; NM_000389;	ENSG00000124762	HGNC:1784	P38936	Cell cycle	ALT associated PML nuclear bodies (APBs);	ALT: enhancing; Telomerase-mediated: ambiguous	ALT	screened	2
DNMT1	1786	NM_001318730; NM_001318731; NM_001130823;	ENSG00000130816	HGNC:2976	P26358	Chromatin organization	DNA methylation; ALT associated PML nuclear bodies (APBs);	ALT: enhancing; Telomerase-mediated: ambiguous	ALT	screened	3
ERCC4	2072	NM_005236;	ENSG00000175595	HGNC:3436	Q92889	DNA replication and repair	DNA repair / damage response; DNA replication; ALT associated PML nuclear bodies (APBs); Telomerase activity;	ALT: enhancing; Telomerase-mediated: repressing	ALT	validated	7
FANCA	2175	NM_000135;	ENSG00000187741	HGNC:3582	O15360	DNA replication and repair	DNA repair / damage response; ALT associated PML nuclear bodies (APBs);	ALT: enhancing; Telomerase-mediated: ambiguous	ALT	validated	5
FANCD2	2177	NM_033084; NM_001018115;	ENSG00000144554	HGNC:3585	Q9BXW9	DNA replication and repair	DNA repair / damage response; Telomere length; ALT associated PML nuclear bodies (APBs);	ALT: ambiguous; Telomerase-mediated: ambiguous	ambiguous	validated	6
FANCL	55120	NM_018062; NM_001114636;	ENSG00000115392	HGNC:20748	Q9NW38	DNA replication and repair	DNA repair / damage response; ALT associated PML nuclear bodies (APBs);	ALT: repressing; Telomerase-mediated: ambiguous	Telomerase-mediated	screened	3
FEN1	2237	NM_004111;	ENSG00000168496	HGNC:3650	P39748	DNA replication and repair	DNA repair / damage response; ALT associated PML nuclear bodies (APBs); DNA replication; DNA recombination;	ALT: enhancing; Telomerase-mediated: ambiguous	ALT	validated	8
GNL3L	54552	NM_001184819; NM_019067;	ENSG00000130119	HGNC:25553	Q9NVN8	Telomere biology	Telomerase activity; Telomere length; ALT associated PML nuclear bodies (APBs);	ALT: repressing; Telomerase-mediated: repressing	ambiguous	validated	8
HDAC7	51564	NM_015401; NM_001098416;	ENSG00000061273	HGNC:14067	Q8WUI4	Chromatin organization	Histone modification / variants; Chromatin structure; ALT associated PML nuclear bodies (APBs);	ALT: enhancing; Telomerase-mediated: ambiguous	ALT	screened	3
HMBOX1	79618	NM_001324382; NM_001324395; NM_001324383; NM_001324384; NM_001324385; NM_001324386; NM_001324387; NM_001324388; NM_001324389; NM_001324390; NM_001324391; NM_001324392; NM_001324393; NM_001324394; NM_001135726;	ENSG00000147421	HGNC:26137	Q6NT76	Telomere biology	ALT associated PML nuclear bodies (APBs); Telomere repeat binding; Telomerase activity;	ALT: enhancing; Telomerase-mediated: enhancing	ambiguous	validated	8
HMGB1	3146	NM_001313892; NM_001313893; NM_002128;	ENSG00000189403	HGNC:4983	P09429	Chromatin organization	Chromatin structure; ALT associated PML nuclear bodies (APBs); Telomerase activity;	ALT: ambiguous; Telomerase-mediated: ambiguous	ambiguous	screened	3
HMGN5	79366	NM_030763;	ENSG00000198157	HGNC:8013	P82970	RNA transcription and processing	ALT associated PML nuclear bodies (APBs);	ALT: repressing; Telomerase-mediated: ambiguous	Telomerase-mediated	screened	2
HNRNPA2B1	3181	NM_002137;	ENSG00000122566	HGNC:5033	P22626	RNA transcription and processing	Telomerase activity; Telomere repeat binding; ALT associated PML nuclear bodies (APBs);	ALT: ambiguous; Telomerase-mediated: enhancing	Telomerase-mediated	screened	3
HUS1	3364	NM_004507;	ENSG00000136273	HGNC:5309	O60921	DNA replication and repair	DNA repair / damage response; ALT associated PML nuclear bodies (APBs);	ALT: ambiguous; Telomerase-mediated: ambiguous	ambiguous	screened	3
KDM1A	23028	NM_015013; NM_001009999;	ENSG00000004487	HGNC:29079	O60341	Chromatin organization	Histone modification / variants; ALT associated PML nuclear bodies (APBs); Telomerase activity; Gene regulation; Telomere repeat binding	ALT: enhancing; Telomerase-mediated: repressing	ALT	validated	8
KDM4C	23081	NM_001146694; NM_001146696; NM_001304339; NM_001304341; NM_001146695; NM_001304340; NM_015061;	ENSG00000282960	HGNC:17071	Q9H3R0	Chromatin organization	Histone modification / variants; Chromatin structure; ALT associated PML nuclear bodies (APBs);	ALT: ambiguous; Telomerase-mediated: ambiguous	ambiguous	predicted	3
KMT5C	84787	NM_032701;	ENSG00000133247	HGNC:28405	Q86Y97	Chromatin organization	Histone modification / variants; ALT associated PML nuclear bodies (APBs);	ALT: enhancing; Telomerase-mediated: ambiguous	ALT	screened	3
MORC3	23515	NM_001320445; NM_001320446; NM_015358;	ENSG00000159256	HGNC:23572	Q14149	RNA transcription and processing	ALT associated PML nuclear bodies (APBs);	ALT: enhancing; Telomerase-mediated: ambiguous	ALT	screened	3
MRE11	4361	NM_005590; NM_005591; NM_001330347;	ENSG00000020922	HGNC:7230	P49959	DNA replication and repair	DNA recombination; Telomerase activity; ALT associated PML nuclear bodies (APBs); DNA repair / damage response; DNA replication	ALT: enhancing; Telomerase-mediated: ambiguous	ALT	validated	8
MUS81	80198	NM_025128;	ENSG00000172732	HGNC:29814	Q96NY9	DNA replication and repair	DNA repair / damage response; ALT associated PML nuclear bodies (APBs); DNA recombination;	ALT: enhancing; Telomerase-mediated: ambiguous	ALT	validated	6
NABP2	79035	NM_024068;	ENSG00000139579	HGNC:28412	Q9BQ15	Cell cycle	ALT associated PML nuclear bodies (APBs); Telomerase activity; Telomere repeat binding;	ALT: ambiguous; Telomerase-mediated: ambiguous	ambiguous	predicted	3
NBN	4683	NM_002485; NM_001024688;	ENSG00000104320	HGNC:7652	O60934	Cell cycle	DNA repair / damage response; ALT associated PML nuclear bodies (APBs); DNA replication; Extrachromosomal telomeric repeat formation; Shelterin binding	ALT: enhancing; Telomerase-mediated: ambiguous	ALT	validated	9
NR2C2	7182	NM_003298; NM_001291694;	ENSG00000177463	HGNC:7972	P49116	RNA transcription and processing	Telomere repeat binding; ALT associated PML nuclear bodies (APBs);	ALT: enhancing; Telomerase-mediated: ambiguous	ALT	validated	6
NR2F2	7026	NM_001145155; NM_001145156; NM_021005;	ENSG00000185551	HGNC:7976	P24468	RNA transcription and processing	ALT associated PML nuclear bodies (APBs); Telomerase activity; Gene regulation;	ALT: enhancing; Telomerase-mediated: repressing	ALT	validated	7
NRIP1	8204	NM_003489;	ENSG00000180530	HGNC:8001	P48552	RNA transcription and processing	ALT associated PML nuclear bodies (APBs);	ALT: ambiguous; Telomerase-mediated: ambiguous	ambiguous	screened	2
NSMCE2	286053	NM_173685;	ENSG00000156831	HGNC:26513	Q96MF7	Protein modification	Sumoylation; ALT associated PML nuclear bodies (APBs); DNA repair / damage response; DNA recombination;	ALT: enhancing; Telomerase-mediated: ambiguous	ALT	validated	7
PARP2	10038	NM_005484; NM_001042618;	ENSG00000129484	HGNC:272	Q9UGN5	DNA replication and repair	ALT associated PML nuclear bodies (APBs); Protein modification;	ALT: enhancing; Telomerase-mediated: ambiguous	ALT	screened	3
PCNA	5111	NM_002592;	ENSG00000132646	HGNC:8729	P12004	Cell cycle	DNA repair / damage response; ALT associated PML nuclear bodies (APBs); DNA replication; DNA recombination;	ALT: ambiguous; Telomerase-mediated: ambiguous	ambiguous	validated	7
PIAS1	8554	NM_016166; NM_001320687;	ENSG00000033800	HGNC:2752	O75925	Protein modification	ALT associated PML nuclear bodies (APBs);	ALT: ambiguous; Telomerase-mediated: ambiguous	ambiguous	screened	2
PIAS4	51588	NM_015897; NM_016149;	ENSG00000105229	HGNC:17002	Q8N2W9	--- not yet entered ---	ALT associated PML nuclear bodies (APBs);	ALT: ambiguous; Telomerase-mediated: ambiguous	ambiguous	predicted	2
PML	5371	NM_033238; NM_033250; NM_033239; NM_033240; NM_033244; NM_033246; NM_033247; NM_033249; NM_002675;	ENSG00000140464	HGNC:9113	P29590	Nuclear organization	ALT associated PML nuclear bodies (APBs); Sumoylation; DNA repair / damage response;	ALT: enhancing; Telomerase-mediated: ambiguous	ALT	validated	9
POT1	25913	NM_001042594; NM_015450;	ENSG00000128513	HGNC:17284	Q9NUX5	Telomere biology	Shelterin component; Telomere repeat binding; Telomere structure; Telomerase activity; ALT associated PML nuclear bodies (APBs)	ALT: repressing; Telomerase-mediated: enhancing	Telomerase-mediated	validated	10
RAD17	5884	NM_133338; NM_133344; NM_133339; NM_133340; NM_133341; NM_133342; NM_133343; NM_001278622;	ENSG00000152942	HGNC:9807	O75943	DNA replication and repair	DNA repair / damage response; ALT associated PML nuclear bodies (APBs);	ALT: ambiguous; Telomerase-mediated: ambiguous	ambiguous	validated	5
RAD50	10111	NM_005732;	ENSG00000113522	HGNC:9816	Q92878	DNA replication and repair	ALT associated PML nuclear bodies (APBs); DNA repair / damage response; DNA recombination; Telomere repeat binding; DNA replication	ALT: enhancing; Telomerase-mediated: repressing	ALT	validated	9
RAD52	5893	NM_001297419; NM_001297422; NM_134422; NM_134424; NM_001297420; NM_001297421; NM_134423;	ENSG00000002016	HGNC:9824	P43351	DNA replication and repair	DNA repair / damage response; ALT associated PML nuclear bodies (APBs);	ALT: ambiguous; Telomerase-mediated: ambiguous	ambiguous	predicted	2
RAD9A	5883	NM_004584; NM_001243224;	ENSG00000172613	HGNC:9827	Q99638	DNA replication and repair	DNA repair / damage response; ALT associated PML nuclear bodies (APBs);	ALT: ambiguous; Telomerase-mediated: ambiguous	ambiguous	screened	3
RAP1A	5906	NM_002884; NM_001010935;	ENSG00000116473	HGNC:9855	P62834	Cell membrane / wall	ALT associated PML nuclear bodies (APBs);	ALT: enhancing; Telomerase-mediated: ambiguous	ALT	predicted	2
RIF1	55183	NM_001177663; NM_001177665; NM_001177664; NM_018151;	ENSG00000080345	HGNC:23207	Q5UIP0	DNA replication and repair	DNA repair / damage response; ALT associated PML nuclear bodies (APBs);	ALT: enhancing; Telomerase-mediated: ambiguous	ALT	validated	5
RPA1	6117	NM_002945;	ENSG00000132383	HGNC:10289	P27694	DNA replication and repair	DNA repair / damage response; ALT associated PML nuclear bodies (APBs); DNA recombination;	ALT: repressing; Telomerase-mediated: ambiguous	Telomerase-mediated	validated	7
RPA2	6118	NM_002946; NM_001137604; NM_001286076;	ENSG00000117748	HGNC:10290	P15927	DNA replication and repair	DNA repair / damage response; ALT associated PML nuclear bodies (APBs); DNA recombination; TERRA;	ALT: ambiguous; Telomerase-mediated: ambiguous	ambiguous	validated	7
SENP1	29843	NM_001267594; NM_001267595; NM_014554;	ENSG00000079387	HGNC:17927	Q9P0U3	--- not yet entered ---	ALT associated PML nuclear bodies (APBs);	ALT: ambiguous; Telomerase-mediated: ambiguous	ambiguous	predicted	2
SENP3	26168	NM_015670;	ENSG00000277957	HGNC:49182	Q9H4L4	--- not yet entered ---	ALT associated PML nuclear bodies (APBs);	ALT: ambiguous; Telomerase-mediated: ambiguous	ambiguous	predicted	2
SENP5	205564	NM_152699; NM_001308045;	ENSG00000119231	HGNC:28407	Q96HI0	--- not yet entered ---	ALT associated PML nuclear bodies (APBs);	ALT: ambiguous; Telomerase-mediated: ambiguous	ambiguous	predicted	2
SENP6	26054	NM_015571; NM_001100409;	ENSG00000112701	HGNC:20944	Q9GZR1	Protein modification	Sumoylation; ALT associated PML nuclear bodies (APBs);	ALT: repressing; Telomerase-mediated: ambiguous	Telomerase-mediated	screened	3
SENP7	57337	NM_001282801; NM_001282804; NM_001282802; NM_001282803; NM_001308133; NM_001308134; NM_001077203;	ENSG00000138468	HGNC:30402	Q9BQF6	--- not yet entered ---	ALT associated PML nuclear bodies (APBs);	ALT: ambiguous; Telomerase-mediated: ambiguous	ambiguous	predicted	2
SIRT1	23411	NM_012238; NM_001142498;	ENSG00000096717	HGNC:14929	Q96EB6	Chromatin organization	Histone modification / variants; Chromatin structure; ALT associated PML nuclear bodies (APBs);	ALT: ambiguous; Telomerase-mediated: ambiguous	ambiguous	predicted	3
SIRT6	51548	NM_001321058; NM_001321064; NM_001321059; NM_001321060; NM_001321061; NM_001321062; NM_001321063; NM_001193285;	ENSG00000077463	HGNC:14934	Q8N6T7	Chromatin organization	Histone modification / variants; Chromatin structure; ALT associated PML nuclear bodies (APBs);	ALT: ambiguous; Telomerase-mediated: ambiguous	ambiguous	predicted	3
SP100	6672	NM_001206701; NM_001206704; NM_001206702; NM_001206703; NM_001080391;	ENSG00000067066	HGNC:11206	P23497	Nuclear organization	ALT associated PML nuclear bodies (APBs);	ALT: enhancing; Telomerase-mediated: ambiguous	ALT	validated	6
SP110	3431	NM_004509; NM_004510; NM_001185015;	ENSG00000280755	HGNC:5401	Q9HB58	RNA transcription and processing	ALT associated PML nuclear bodies (APBs);	ALT: ambiguous; Telomerase-mediated: ambiguous	ambiguous	predicted	2
STAG2	10735	NM_001042749; NM_001042751; NM_001042750; NM_001282418;	ENSG00000101972	HGNC:11355	Q8N3U4	Cell cycle	Chromatid cohesion; ALT associated PML nuclear bodies (APBs);	ALT: ambiguous; Telomerase-mediated: ambiguous	ambiguous	screened	3
SUMO1	7341	NM_001005781; NM_001005782; NM_003352;	ENSG00000116030	HGNC:12502	P63165	Protein modification	Sumoylation; ALT associated PML nuclear bodies (APBs);	ALT: enhancing; Telomerase-mediated: ambiguous	ALT	validated	6
SUMO2	6613	NM_001005849;	ENSG00000188612	HGNC:11125	P61956	Protein modification	Sumoylation; ALT associated PML nuclear bodies (APBs);	ALT: enhancing; Telomerase-mediated: ambiguous	ALT	validated	6
SUMO3	6612	NM_006936; NM_001286416;	ENSG00000184900	HGNC:11124	P55854	Protein modification	ALT associated PML nuclear bodies (APBs);	ALT: enhancing; Telomerase-mediated: ambiguous	ALT	validated	6
TEP1	7011	NM_007110; NM_001319035;	ENSG00000129566	HGNC:11726	Q99973	Telomere biology	Telomerase activity; DNA recombination; ALT associated PML nuclear bodies (APBs);	ALT: enhancing; Telomerase-mediated: ambiguous	ALT	validated	7
TERF1	7013	NM_017489; NM_003218;	ENSG00000147601	HGNC:11728	P54274	Telomere biology	Shelterin component; Telomere repeat binding; Telomere structure; ALT associated PML nuclear bodies (APBs); Telomerase activity	ALT: ambiguous; Telomerase-mediated: ambiguous	ambiguous	validated	10
TERF2	7014	NM_005652;	ENSG00000132604	HGNC:11729	Q15554	Telomere biology	Shelterin component; Telomere repeat binding; Telomere structure; ALT associated PML nuclear bodies (APBs); Telomerase activity	ALT: ambiguous; Telomerase-mediated: ambiguous	ambiguous	validated	10
TERF2IP	54386	NM_018975;	ENSG00000166848	HGNC:19246	Q9NYB0	Telomere biology	Shelterin component; Telomere repeat binding; Telomere structure; ALT associated PML nuclear bodies (APBs); Telomerase activity	ALT: ambiguous; Telomerase-mediated: ambiguous	ambiguous	validated	10
TINF2	26277	NM_012461; NM_001099274;	ENSG00000092330	HGNC:11824	Q9BSI4	Telomere biology	Shelterin component; Telomere repeat binding; Telomere structure; ALT associated PML nuclear bodies (APBs); Telomerase activity	ALT: ambiguous; Telomerase-mediated: ambiguous	ambiguous	validated	10
TOP3A	7156	NM_004618; NM_001320759;	ENSG00000177302	HGNC:11992	Q13472	DNA replication and repair	DNA recombination; ALT associated PML nuclear bodies (APBs);	ALT: enhancing; Telomerase-mediated: ambiguous	ALT	validated	6
TP53BP1	7158	NM_001141979; NM_001141980; NM_005657;	ENSG00000067369	HGNC:11999	Q12888	DNA replication and repair	DNA repair / damage response; Gene regulation; Telomerase activity; ALT associated PML nuclear bodies (APBs);	ALT: enhancing; Telomerase-mediated: repressing	ALT	screened	4
UBE2I	7329	NM_194259; NM_194261; NM_194260; NM_003345;	ENSG00000103275	HGNC:12485	P63279	Protein modification	ALT associated PML nuclear bodies (APBs);	ALT: enhancing; Telomerase-mediated: ambiguous	ALT	validated	6
UPF1	5976	NM_002911; NM_001297549;	ENSG00000005007	HGNC:9962	Q92900	RNA transcription and processing	DNA replication; Telomere repeat binding; ALT associated PML nuclear bodies (APBs);	ALT: ambiguous; Telomerase-mediated: ambiguous	ambiguous	predicted	3
WRN	7486	NM_000553;	ENSG00000165392	HGNC:12791	Q14191	DNA replication and repair	DNA repair / damage response; Telomere structure; Extrachromosomal telomeric repeat formation; DNA recombination; ALT associated PML nuclear bodies (APBs)	ALT: enhancing; Telomerase-mediated: ambiguous	ALT	validated	7
XRCC6	2547	NM_001288976; NM_001288978; NM_001288977; NM_001469;	ENSG00000196419	HGNC:4055	P12956	DNA replication and repair	DNA repair / damage response; ALT associated PML nuclear bodies (APBs); Telomere repeat binding; Telomere structure;	ALT: enhancing; Telomerase-mediated: ambiguous	ALT	validated	8
ZBTB48	3104	NM_005341; NM_001278647; NM_001278648;	ENSG00000204859	HGNC:4930	P10074	Telomere biology	Telomere repeat binding; Telomerase localization; Telomere length; ALT associated PML nuclear bodies (APBs); Extrachromosomal telomeric repeat formation	ALT: enhancing; Telomerase-mediated: ambiguous	ALT	validated	8
