# Supplementary material for: Identification of Key Proteins in the Alternative Lengthening of Telomeres Associated Promyelocytic Leukemia Nuclear Bodies
Source: Preprints.org preprint supplement (doi:10.20944/preprints202110.0001.v1), 2021-10-01
Supplement: Supplementary file 3 [file S2_File.xlsx]

## Sheet: Sheet1
Table S2. Genomic, transcriptomic and proteomic alterations across the 32 PCA studies
Genetic Alteration		TCGA_LAML (n=165)	TCGA_ACC (n=76)	TCGA_BLCA (n=402)	TCGA_LGG (n=507)	TCGA_BRCA (n=994)	TCGA_CESC (n=275)	TCGA_CHOL (n=36)	TCGA_COAD (n=524)	TCGA_DLBC (n=39)	TCGA_ESCA (n=181)	TCGA_GBM (n=145)	TCGA_HNSC (n=488)	TCGA_KICH	TCGA_KIRC (n=352)	TCGA_KIRP (n=274)	TCGA_LIHC (n=348)	TCGA_LUAD (n=503)	TCGA_LUSC (n=466)	TCGA_MESO (n=82)	TCGA_OV (n=201)	TCGA_PAAD (n=168)	TCGA_PCPG (n=161)	TCGA_PRAD (n=488)	TCGA_SARC (n=251)	TCGA_SKCM (n=363)	TCGA_STAD (n=407)	TCGA_TGCT (n=144)	TCGA_THYM (n=119)	TCGA_THCA (n=480)	TCGA_UCS (n=56)	TCGA_UCEC (n=507)	TCGA_UVM (n=80)	TOTAL
CNA	Amplification	23	61	393	204	988	183	12	132	23	244	134	400	10	72	20	222	304	500	32	979	115	43	240	301	215	324	21	14	7	80	355	9	6660
	Deep Deletion	14	14	133	92	236	72	4	128	17	71	26	102	2	42	31	111	165	124	4	231	16	22	236	88	41	122	14	12	16	11	84	15	2296
	homdel	0	0	0	0	0	0	0	0	0	0	0	0	0	0	0	0	0	0	0	0	0	0	0	0	0	0	0	0	0	0	0	0	0
	homdel_rec	5	2	21	3	60	17	0	25	4	7	12	20	2	17	11	7	32	21	7	47	1	1	59	21	27	35	5	2	4	3	16	5	499
mRNA	mRNA High	454	600	1945	1720	5354	1394	149	2341	203	984	637	2439	239	1613	1252	1673	2456	2459	354	1463	621	511	1521	1194	1840	1850	790	258	1182	359	2086	262	42203
	mRNA Low	145	28	231	581	1141	386	62	932	24	112	204	326	90	482	169	239	386	301	104	885	271	369	639	155	486	169	51	90	602	92	335	60	10147
Mutation	Inframe Mutation (Putative Driver)	0	0	0	0	0	0	0	0	0	0	0	0	0	0	0	0	0	0	0	0	0	0	0	0	0	0	0	0	0	0	0	0	0
	Inframe Mutation (Putative Passenger)	0	0	3	2	4	0	0	11	2	3	0	2	1	0	0	5	2	1	0	4	0	0	1	0	0	9	0	0	0	0	9	0	59
	Truncating (Putative Driver)	3	5	101	5	33	15	1	88	1	6	19	9	2	21	10	10	27	17	0	8	5	3	11	3	34	74	1	1	3	2	173	0	691
	Truncating (Putative Passenger)	6	2	37	11	60	25	0	91	0	10	16	31	2	18	12	15	30	28	0	12	3	0	12	6	79	119	1	1	3	3	229	0	862
	Missense (Putative Driver)	0	0	6	0	3	1	0	16	0	1	0	2	0	0	1	1	6	1	0	1	1	0	3	2	3	8	0	0	0	0	16	0	72
	Missense (Putative Passenger)	17	21	452	74	291	207	8	550	8	92	139	273	7	76	82	110	419	313	12	127	43	4	72	55	864	425	9	6	33	25	1329	5	6148
	Splice	11	1	15	5	14	7	0	15	1	4	6	13	0	2	6	5	31	21	0	10	1	1	1	2	52	17	0	0	0	0	61	0	302
	Splice_rec	3	1	14	3	8	6	0	13	0	2	6	6	1	2	3	6	8	10	0	5	4	1	0	2	19	11	0	0	2	0	31	0	167
Protein	Protein High	0	6	47	72	137	28	6	59	2	24	33	47	10	64	27	33	44	42	6	62	21	11	40	30	54	61	18	13	55	10	62	1	1125
	Protein Low	0	6	57	36	114	31	3	84	4	10	25	18	14	70	16	27	59	54	10	50	12	10	33	9	58	46	12	13	31	6	55	1	974
Fusion	Fusion	18	3	17	11	53	5	1	3	0	9	5	5	0	2	1	11	20	12	3	14	1	2	20	31	10	13	0	1	1	5	10	0	287
