# Supplementary material for: Identification of Key Proteins in the Alternative Lengthening of Telomeres Associated Promyelocytic Leukemia Nuclear Bodies
Source: Preprints.org preprint supplement (doi:10.20944/preprints202110.0001.v1), 2021-10-01
Supplement: Supplementary file 4 [file S3_File.xlsx]

## Sheet: Sheet1
Table S3. TCGA Study vs Alteration (normalized)
TCGA Study	Amplification	Deep Deletion	homdel	mRNA High	mRNA Low	Inframe Mutation (Putative Driver)	Inframe Mutation (Putative Passenger)	Truncating (Putative Driver)	Truncating (Putative Passenger)	Missense (Putative Driver)	Missense (Putative Passenger)	Splice	Protein High	Protein Low	Fusion
TCGA_UCS (n=56)	1.40351	0.192982	0.0526316	6.29825	1.61404	0	0	0.0350877	0.0526316	0	0.438596	0	0.175439	0.105263	0.0877193
TCGA_UCEC (n=507)	0.671078	0.15879	0.0302457	3.94329	0.63327	0	0.0170132	0.327032	0.432892	0.0302457	2.51229	0.173913	0.117202	0.10397	0.0189036
TCGA_ESCA (n=181)	1.34066	0.39011	0.0384615	5.40659	0.615385	0	0.0164835	0.032967	0.0549451	0.00549451	0.505495	0.032967	0.131868	0.0549451	0.0494505
TCGA_SKCM (n=363)	0.486425	0.0927602	0.061086	4.1629	1.09955	0	0	0.0769231	0.178733	0.00678733	1.95475	0.160633	0.122172	0.131222	0.0226244
TCGA_BLCA (n=402)	0.956204	0.323601	0.0510949	4.73236	0.562044	0	0.00729927	0.245742	0.0900243	0.0145985	1.09976	0.0705596	0.114355	0.138686	0.0413625
TCGA_ACC (n=76)	0.663043	0.152174	0.0217391	6.52174	0.304348	0	0	0.0543478	0.0217391	0	0.228261	0.0217391	0.0652174	0.0652174	0.0326087
TCGA_LUSC (n=466)	1.02669	0.25462	0.0431211	5.04928	0.61807	0	0.00205339	0.0349076	0.0574949	0.00205339	0.64271	0.063655	0.0862423	0.110883	0.0246407
TCGA_CESC (n=275)	0.616162	0.242424	0.0572391	4.6936	1.29966	0	0	0.0505051	0.0841751	0.003367	0.69697	0.043771	0.0942761	0.104377	0.016835
TCGA_BRCA (n=994)	0.911439	0.217712	0.0553506	4.93911	1.05258	0	0.00369004	0.0304428	0.0553506	0.00276753	0.26845	0.0202952	0.126384	0.105166	0.048893
TCGA_COAD (n=524)	0.222222	0.215488	0.0420875	3.94108	1.56902	0	0.0185185	0.148148	0.153199	0.026936	0.925926	0.047138	0.0993266	0.141414	0.00505051
TCGA_STAD (n=407)	0.736364	0.277273	0.0795455	4.20455	0.384091	0	0.0204545	0.168182	0.270455	0.0181818	0.965909	0.0636364	0.138636	0.104545	0.0295455
TCGA_SARC (n=251)	1.18039	0.345098	0.0823529	4.68235	0.607843	0	0	0.0117647	0.0235294	0.00784314	0.215686	0.0156863	0.117647	0.0352941	0.121569
TCGA_HNSC (n=488)	0.764818	0.195029	0.0382409	4.66348	0.623327	0	0.00382409	0.0172084	0.0592734	0.00382409	0.521989	0.0363289	0.0898662	0.0344168	0.00956023
TCGA_LUAD (n=503)	0.537102	0.291519	0.0565371	4.33922	0.681979	0	0.00353357	0.0477032	0.0530035	0.0106007	0.740283	0.0689046	0.0777385	0.10424	0.0353357
TCGA_CHOL (n=36)	0.333333	0.111111	0	4.13889	1.72222	0	0	0.0277778	0	0	0.222222	0	0.166667	0.0833333	0.0277778
TCGA_OV (n=201)	1.6735	0.394872	0.0803419	2.50085	1.51282	0	0.00683761	0.0136752	0.0205128	0.0017094	0.217094	0.025641	0.105983	0.0854701	0.0239316
TCGA_LIHC (n=348)	0.596774	0.298387	0.0188172	4.49731	0.642473	0	0.0134409	0.0268817	0.0403226	0.00268817	0.295699	0.0295699	0.0887097	0.0725806	0.0295699
TCGA_TGCT (n=144)	0.14094	0.0939597	0.033557	5.30201	0.342282	0	0	0.00671141	0.00671141	0	0.0604027	0	0.120805	0.0805369	0
TCGA_MESO (n=82)	0.367816	0.045977	0.0804598	4.06897	1.1954	0	0	0	0	0	0.137931	0	0.0689655	0.114943	0.0344828
TCGA_PAAD (n=168)	0.625	0.0869565	0.00543478	3.375	1.47283	0	0	0.0271739	0.0163043	0.00543478	0.233696	0.0271739	0.11413	0.0652174	0.00543478
TCGA_DLBC (n=39)	0.479167	0.354167	0.0833333	4.22917	0.5	0	0.0416667	0.0208333	0	0	0.166667	0.0208333	0.0416667	0.0833333	0
TCGA_KICH (n=65)	0.153846	0.0307692	0.0307692	3.67692	1.38462	0	0.0153846	0.0307692	0.0307692	0	0.107692	0.0153846	0.153846	0.215385	0
TCGA_PRAD (n=488)	0.48583	0.477733	0.119433	3.07895	1.29352	0	0.00202429	0.0222672	0.0242915	0.00607287	0.145749	0.00202429	0.0809717	0.0668016	0.0404858
TCGA_KIRP (n=274)	0.0706714	0.109541	0.0388693	4.42403	0.597173	0	0	0.0353357	0.0424028	0.00353357	0.289753	0.0318021	0.0954064	0.0565371	0.00353357
TCGA_PCPG (n=161)	0.241573	0.123596	0.00561798	2.87079	2.07303	0	0	0.0168539	0	0	0.0224719	0.011236	0.0617978	0.0561798	0.011236
TCGA_LGG (n=507)	0.396887	0.178988	0.00583658	3.3463	1.13035	0	0.00389105	0.00972763	0.0214008	0	0.143969	0.0155642	0.140078	0.0700389	0.0214008
TCGA_KIRC (n=352)	0.140625	0.0820312	0.0332031	3.15039	0.941406	0	0	0.0410156	0.0351562	0	0.148438	0.0078125	0.125	0.136719	0.00390625
TCGA_UVM (n=80)	0.1125	0.1875	0.0625	3.275	0.75	0	0	0	0	0	0.0625	0	0.0125	0.0125	0
TCGA_LAML (n=165)	0.139394	0.0848485	0.030303	2.75152	0.878788	0	0	0.0181818	0.0363636	0	0.10303	0.0848485	0	0	0.109091
TCGA_THCA (n=480)	0.0140281	0.0320641	0.00801603	2.36874	1.20641	0	0	0.00601202	0.00601202	0	0.0661323	0.00400802	0.11022	0.0621242	0.00200401
TCGA_THYM (n=119)	0.113821	0.097561	0.0162602	2.09756	0.731707	0	0	0.00813008	0.00813008	0	0.0487805	0	0.105691	0.105691	0.00813008
TCGA_GBM (n=145)	0.22906	0.0444444	0.0205128	1.08889	0.348718	0	0	0.0324786	0.0273504	0	0.237607	0.0205128	0.0564103	0.042735	0.00854701
