# Supplementary material for: Identification of Key Proteins in the Alternative Lengthening of Telomeres Associated Promyelocytic Leukemia Nuclear Bodies
Source: Preprints.org preprint supplement (doi:10.20944/preprints202110.0001.v1), 2021-10-01
Supplement: Supplementary file 6 [file S5_File.xlsx]

## Sheet: Sheet1
Table S5. OncoPrint
Gene	Amplification	Deep Deletion	homdel	mRNA High	mRNA Low	Inframe Mutation (Putative Driver)	Inframe Mutation (Putative Passenger)	Truncating (Putative Driver)	Truncating (Putative Passenger)	Missense (Putative Driver)	Missense (Putative Passenger)	Splice	Protein High	Protein Low	Fusion
NSMCE2	699	8	0	1725	42	0	1	0	4	0	30	2	0	0	12
SENP5	535	37	0	1597	200	0	1	0	21	0	83	2	0	0	8
TERF1	306	5	0	1311	140	0	0	0	7	0	58	6	0	0	4
NBN	343	0	11	1155	120	0	0	35	0	0	92	6	0	0	2
ATR	208	0	9	979	183	0	1	75	0	0	267	20	0	0	6
ATM	46	0	81	340	64	0	7	169	0	48	294	36	116	237	6
HUS1	97	10	0	1154	112	0	0	0	9	0	31	2	0	0	0
PCNA	63	10	0	899	31	0	0	0	5	0	32	2	251	99	0
MRE11	75	0	37	550	215	0	0	29	0	0	84	4	267	69	2
KDM4C	121	107	0	528	374	0	0	0	21	0	123	8	0	0	10
CBX3	104	8	0	1002	98	0	0	0	14	0	31	3	0	0	2
XRCC6	35	24	0	647	460	0	0	0	8	0	69	5	0	0	5
RAD50	56	0	32	470	186	0	0	37	0	0	119	3	190	144	4
TP53BP1	10	0	64	348	149	0	5	67	0	0	189	8	150	243	5
WRN	43	251	0	528	156	0	1	0	37	0	157	5	0	0	9
TERF2	44	53	0	424	604	0	0	0	7	0	41	6	0	0	3
POT1	72	0	23	851	96	0	0	11	0	9	108	9	0	0	1
RAD17	11	77	0	433	472	0	0	0	17	0	78	6	0	0	5
RAD52	221	20	0	749	49	0	1	0	8	1	37	6	0	0	6
TINF2	65	22	0	483	455	0	1	0	9	0	41	4	0	0	0
UPF1	100	14	0	601	191	0	1	0	17	0	140	7	0	0	3
BAZ2A	76	5	0	622	144	0	2	0	31	0	165	11	0	0	4
SENP6	47	49	0	379	424	0	2	0	37	0	102	10	0	0	10
PARP2	89	20	0	702	156	0	1	0	7	0	66	6	0	0	0
UBE2I	80	36	0	755	142	0	0	0	1	0	21	0	0	0	5
SUMO2	170	5	0	792	51	0	0	0	3	0	10	2	0	0	4
DNMT1	140	13	0	603	59	0	2	0	17	9	164	14	0	0	10
RPA1	34	63	0	407	431	0	0	0	4	0	56	12	0	0	2
TOP3A	63	45	0	488	269	0	1	0	26	0	107	3	0	0	7
ERCC4	86	0	2	647	121	0	1	19	0	1	116	4	0	0	0
TERF2IP	26	72	0	455	383	0	0	0	11	0	34	1	0	0	3
STC2	61	0	26	496	113	0	2	112	0	0	143	23	0	0	5
SENP3	15	88	0	463	325	0	0	0	18	0	52	4	0	0	5
CDKN1A	90	0	11	417	0	0	0	48	0	0	46	4	151	182	1
TEP1	92	0	20	403	73	0	0	0	42	0	267	28	0	0	1
RAD9A	227	3	0	632	8	0	2	0	4	0	39	2	0	0	8
BLM	125	0	10	594	12	0	1	30	0	0	135	9	0	0	4
HNRNPA2B1	105	9	0	594	111	0	3	0	12	0	63	13	0	0	5
SENP1	54	15	0	630	121	0	0	0	28	0	60	4	0	0	1
RIF1	22	37	0	509	17	0	4	0	67	0	229	9	0	0	3
HMGB1	83	34	0	552	183	0	1	0	5	0	23	4	0	0	2
HMBOX1	31	276	0	471	32	0	0	0	4	0	56	4	0	0	5
FANCD2	91	0	38	522	19	0	1	35	0	0	138	18	0	0	7
MUS81	106	15	0	549	119	0	0	0	9	0	59	5	0	0	3
FANCA	39	0	127	502	5	0	1	20	0	4	144	13	0	0	6
SENP7	118	6	0	480	56	0	1	0	37	0	131	21	0	0	2
KMT5C	98	26	0	664	5	0	0	0	9	0	41	0	0	0	1
PIAS4	45	60	0	432	230	0	0	0	6	0	60	3	0	0	7
SUMO3	48	39	0	572	151	0	0	0	3	0	9	5	0	0	2
NABP2	80	6	0	676	22	0	0	0	3	0	26	2	0	0	4
NRIP1	67	85	0	420	35	0	0	0	56	0	132	0	0	0	11
MORC3	49	22	0	361	234	0	3	0	16	0	107	6	0	0	6
GNL3L	78	41	0	507	48	0	0	0	5	0	114	7	0	0	3
SUMO1	55	25	0	567	129	0	0	0	9	0	13	2	0	0	3
ACD	31	46	0	523	110	0	0	0	7	0	73	3	0	0	0
HDAC7	74	18	0	515	62	0	3	0	16	0	84	5	0	0	6
SP100	16	72	0	388	104	0	3	0	36	0	155	9	0	0	0
SIRT1	37	21	0	376	242	0	0	0	18	0	68	4	0	0	2
ZBTB48	58	60	0	470	83	0	0	0	16	0	55	1	0	0	1
FANCL	69	0	8	559	27	0	0	4	0	0	54	10	0	0	0
RPA2	22	29	0	471	170	0	0	0	3	0	30	1	0	0	1
PIAS1	32	7	0	417	151	0	2	0	14	0	79	7	0	0	6
RAP1A	30	50	0	374	212	0	0	0	5	0	29	6	0	0	5
NR2C2	69	27	0	316	199	0	0	0	19	0	63	2	0	0	6
PML	51	13	0	448	42	0	2	0	12	0	107	3	0	0	17
KDM1A	34	33	0	449	71	0	0	0	15	0	73	2	0	0	2
FEN1	55	8	0	539	4	0	0	0	5	0	37	1	0	0	1
SIRT6	48	50	0	482	22	0	0	0	6	0	29	2	0	0	3
SP110	16	67	0	431	19	0	0	0	10	0	82	10	0	0	2
NR2F2	137	21	0	351	4	0	2	0	9	0	67	0	0	0	2
HMGN5	37	33	0	457	0	0	0	0	17	0	31	4	0	0	0
